# Supplementary material for: Juniperus sabina L. as a Source of Podophyllotoxins: Extraction Optimization and Anticholinesterase Activities
Source: MDPI journal article supplement (doi:10.3390/ijms231810205), 2022-09-06
Supplement: s1 [file s1]

## Supplementary Material-Tables

**Supplementary material Table S1. Experimental variables involved in the study.**

| Variable    | Definition and Units                   | Nomenclature                     | Value/range |
|-------------|----------------------------------------|----------------------------------|-------------|
| Fixed       | Extraction Temperature (°C)            |                                  | 55 °C       |
|             | Extraction time (hours)                |                                  | 1.5 h       |
|             | Shaking speed (rpm)                    |                                  | 150 rpm     |
|             | Ultrasonic power                       |                                  | 100 KHz     |
| Independent | Ratio of material to liquid (g/mL)     | RLM (x <sub>1</sub> )            | 1:20-1:40   |
|             | Methanol concentration (% v/v)         | Methanol % (x <sub>2</sub> )     | 60-100      |
|             | Ultrasonic time (min)                  | T <sub>U</sub> (x <sub>3</sub> ) | 5-15        |
| Dependent   | Total phenolic content (mg GAE/g DW)   | TPC (y <sub>1</sub> )            |             |
|             | Podophyllotoxin content (mg/g DW)      | PPT (y <sub>2</sub> )            |             |
|             | Deoxypodophyllotoxin content (mg/g DW) | DPT (y <sub>3</sub> )            |             |
|             | Extraction yield (mg/g DW)             | E. yield (y <sub>4</sub> )       |             |
|             | ABTS (μmol trolox /100g DW)            | ABTS (y <sub>5</sub> )           |             |
|             | FRAP (μmol trolox /100g DW)            | FRAP (y <sub>6</sub> )           |             |
|             | DPPH (μmol trolox /100g DW)            | DPPH (y <sub>7</sub> )           |             |

DW: Dry weight.

**Supplementary material Table S2. Predicted and experimental values under optimum conditions resulting from the simultaneous optimization of the seven responses considered.**

| Factor | Independent variables | Solution | Optimal extraction condition | Desirability |
|--------|-----------------------|----------|------------------------------|--------------|
| A      | RLM                   | 1        | 1:40                         | 0.867        |
| B      | MeOH (%)              | 0.685    | 93.7                         |              |
| C      | Tu (min)              | -0.485   | 7.575                        |              |

## Supplementary Material-Figures

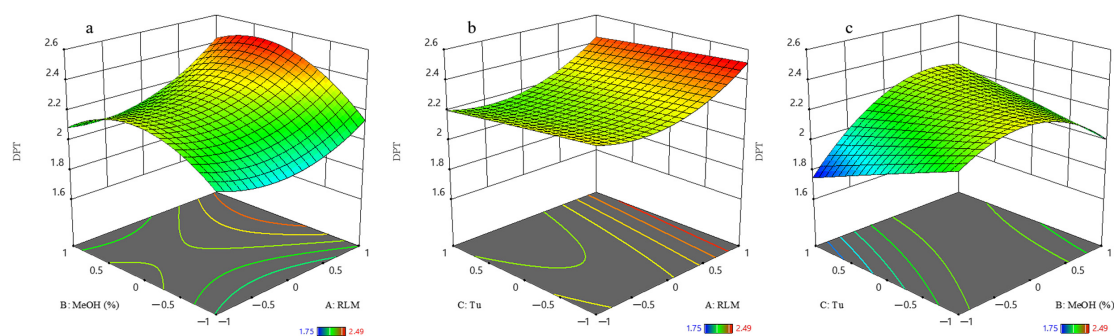

**Supplementary material Figure S1.** Response surface of deoxypodophyllotoxin content (a) as a function of ratio of material to liquid and percentage of methanol; (b) as a function of ratio of material to liquid and ultrasonic time; (c) as a function of percentage of methanol and ultrasonic time.

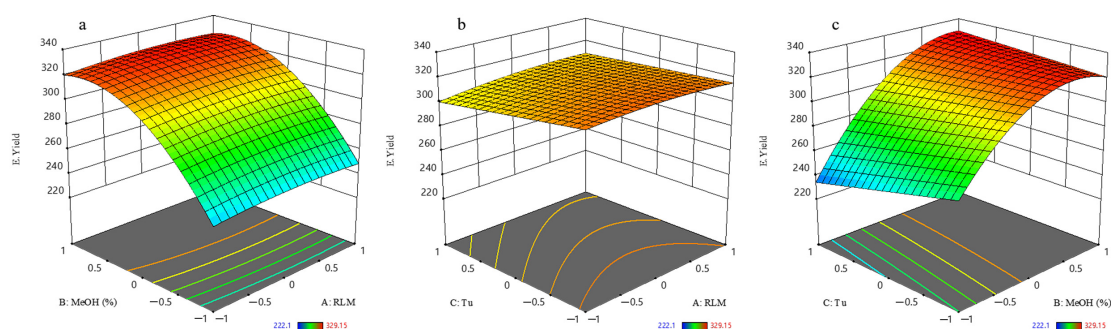

**Supplementary material Figure S2.** Response surface of extraction yield: (a) as a function of ratio of material to liquid and percentage of methanol; (b) as a function of ratio of material to liquid and ultrasonic time; (c) as a function of percentage of methanol and ultrasonic time.

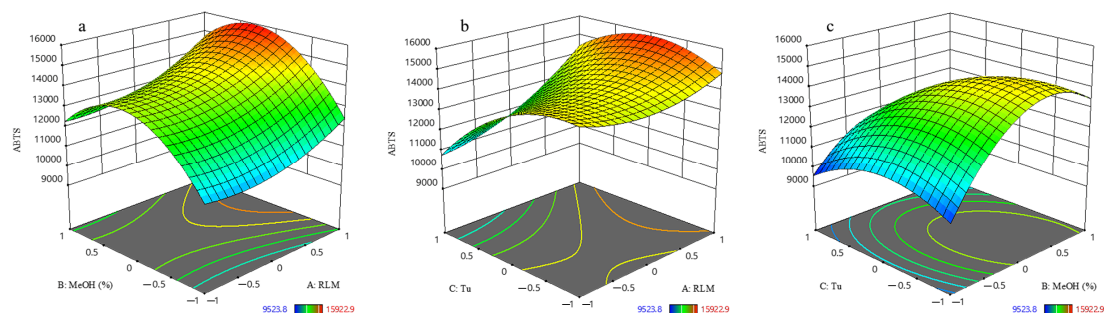

**Supplementary material Figure S3.** Response surface of ABTS capacity (a) as a

function of ratio of material to liquid and percentage of methanol; (b) as a function of ratio of material to liquid and ultrasonic time; (c) as a function of percentage of methanol and ultrasonic time.

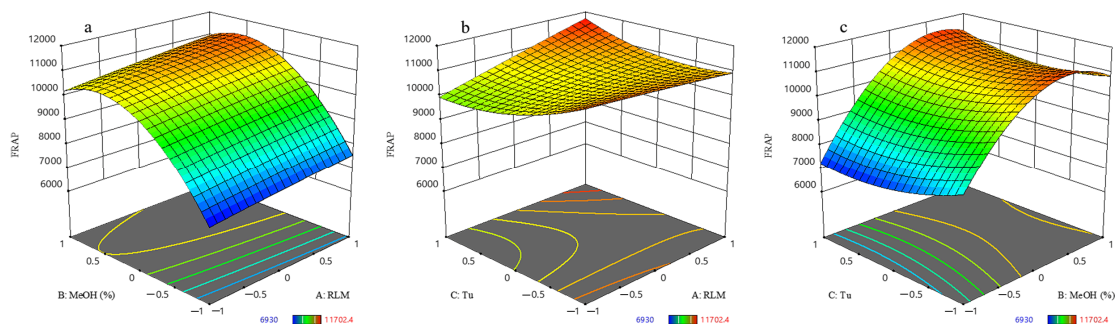

**Supplementary material Figure S4.** Response surface of FRAP capacity (a) as a function of ratio of material to liquid and percentage of methanol; (b) as a function of ratio of material to liquid and ultrasonic time; (c) as a function of percentage of methanol and ultrasonic time.

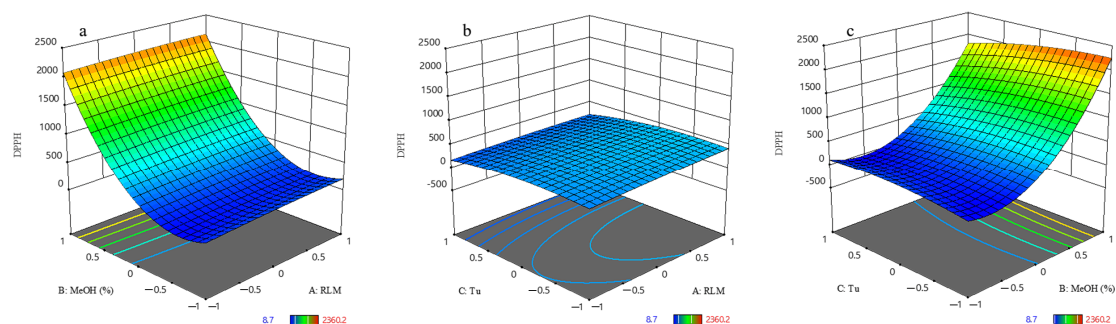

**Supplementary material Figure S5.** Response surface of DPPH activity (a) as a function of ratio of material to liquid and percentage of methanol; (b) as a function of ratio of material to liquid and ultrasonic time; (c) as a function of percentage of methanol and ultrasonic time.
